# Supplementary material for: Suppressing the dynamic precipitation and lowering the thermal conductivity for stable and high thermoelectric performance in BaCu2Te2 based materials
Source: Royal Society of Chemistry journal article supplement (doi:10.1039/d0ta00245c), 2020-01-01
Supplement: d0ta00245c1.pdf [file d0ta00245c1.pdf]

# Suppressing the Dynamic Precipitation and Lowering the Thermal Conductivity for Stable and High Thermoelectric Performance in BaCu<sub>2</sub>Te<sub>2</sub> Based Materials

Kai Guo,<sup>†a</sup> Jianwei Lin,<sup>†a</sup> Yang Li,<sup>a</sup> Yifan Zhu,<sup>b,c</sup> Xin Li,<sup>b</sup> Xinxin Yang,<sup>a</sup> Juanjuan Xing,<sup>a</sup> Jiong Yang,<sup>\*b</sup>

Jun Luo <sup>\*a,b</sup> and Jing-Tai Zhao <sup>d,e</sup>

<sup>a</sup> School of Materials Science and Engineering, Shanghai University, 99 Shangda Road, Shanghai 200444, China

<sup>b</sup> Materials Genome Institute, Shanghai University, 99 Shangda Road, Shanghai 200444, China

<sup>c</sup> State Key Laboratory of High Performance Ceramics and Superfine Microstructure, Shanghai Institute of Ceramics, Chinese Academy of Science, 1295 Dingxi Road, Shanghai 200444, China

<sup>d</sup> School of Materials Science and Engineering, Guilin University of Electronic Technology, Guilin 541004, China

<sup>e</sup> Guangxi Key Laboratory of Information Materials, Guilin University of Electronic Technology, Guilin 541004, China

<sup>†</sup> These authors contributed equally to this work.

\* Corresponding author. E-mail: [jiongy@t.shu.edu.cn](mailto:jiongy@t.shu.edu.cn) (J. Yang); [junluo@shu.edu.cn](mailto:junluo@shu.edu.cn) (J. Luo)

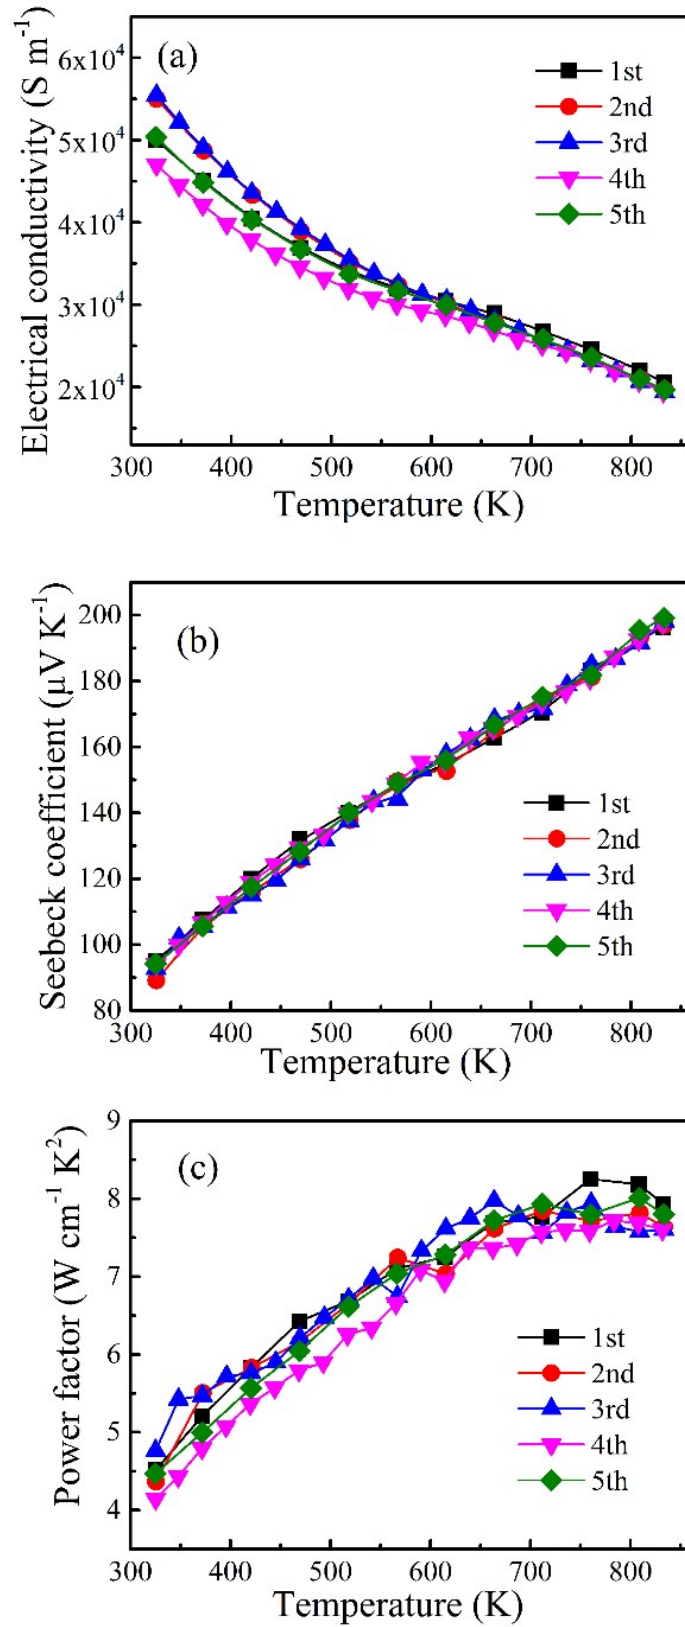

**Figure S1.** The repeated measurements of electrical conductivity (a), Seebeck coefficient (b) and power factor (c) for the high-performance  $BaCu_{2.04}Te_2$  sample, indicating a good thermal stability.

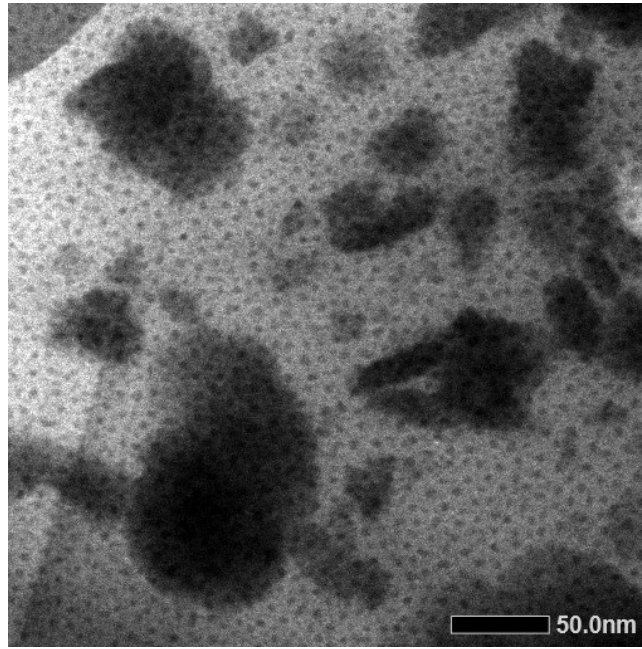

**Figure S2.** The selected area for EDS mapping.

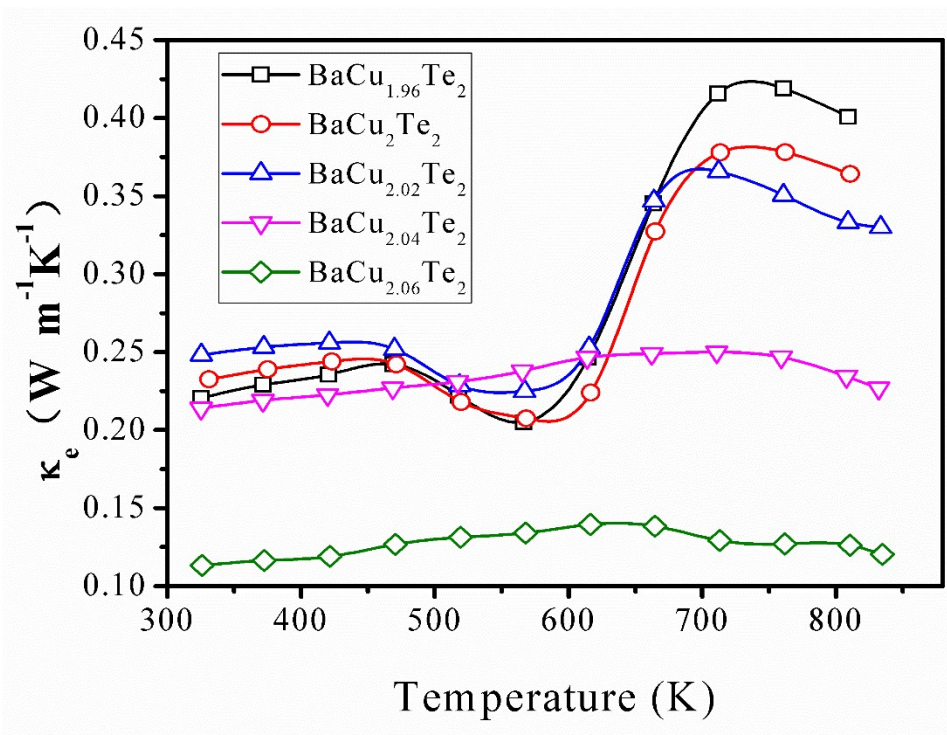

**Figure S3.** The temperature dependences of the electronic thermal conductivities for BaCu<sub>2+x</sub>Te<sub>2</sub> samples ( $x = -0.04, 0, 0.02, 0.04, 0.06$  and  $0.08$ ).
